# Supplementary material for: The velvet worm brain unveils homologies and evolutionary novelties across panarthropods
Source: Springer Nature journal article supplement (doi:10.1186/s12915-021-01196-w), 2022-01-25

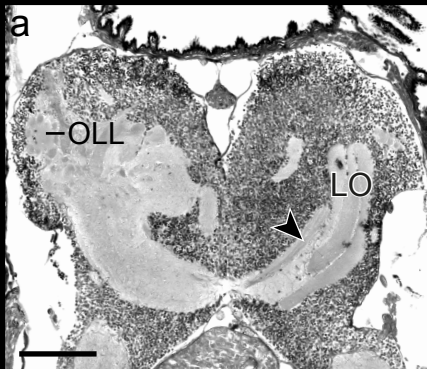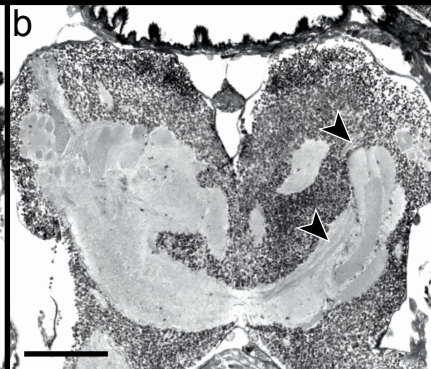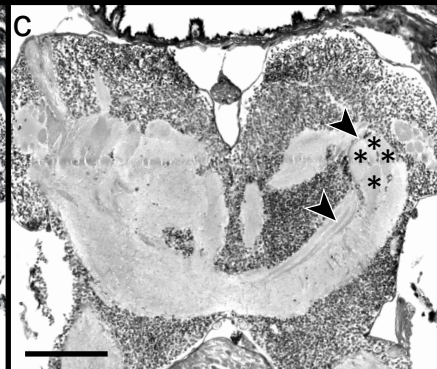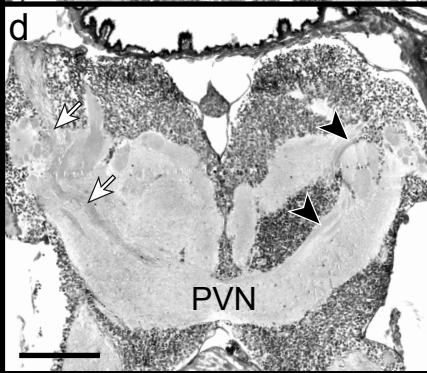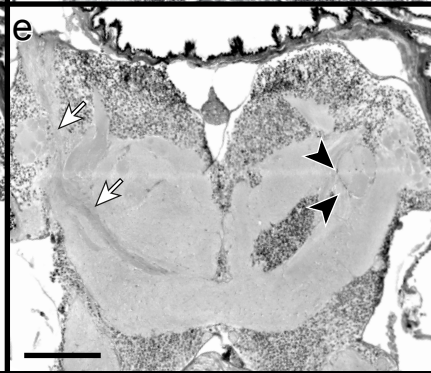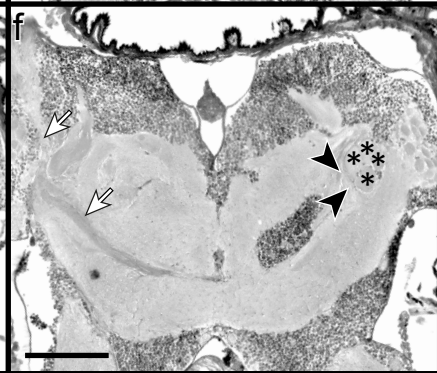

Supplement: 12915_2021_1196_MOESM3_ESM.pdf [file 12915_2021_1196_MOESM3_ESM.pdf]
